# Supplementary material for: Molecular and serological epidemiology of Leptospira infection in cats in Okinawa Island, Japan
Source: PubMed Central journal article supplement (PMC8121857; doi:10.1038/s41598-021-89872-3), 2021-05-14
Supplement: 41598_2021_89872_MOESM1_ESM.pdf [file 41598_2021_89872_MOESM1_ESM.pdf]

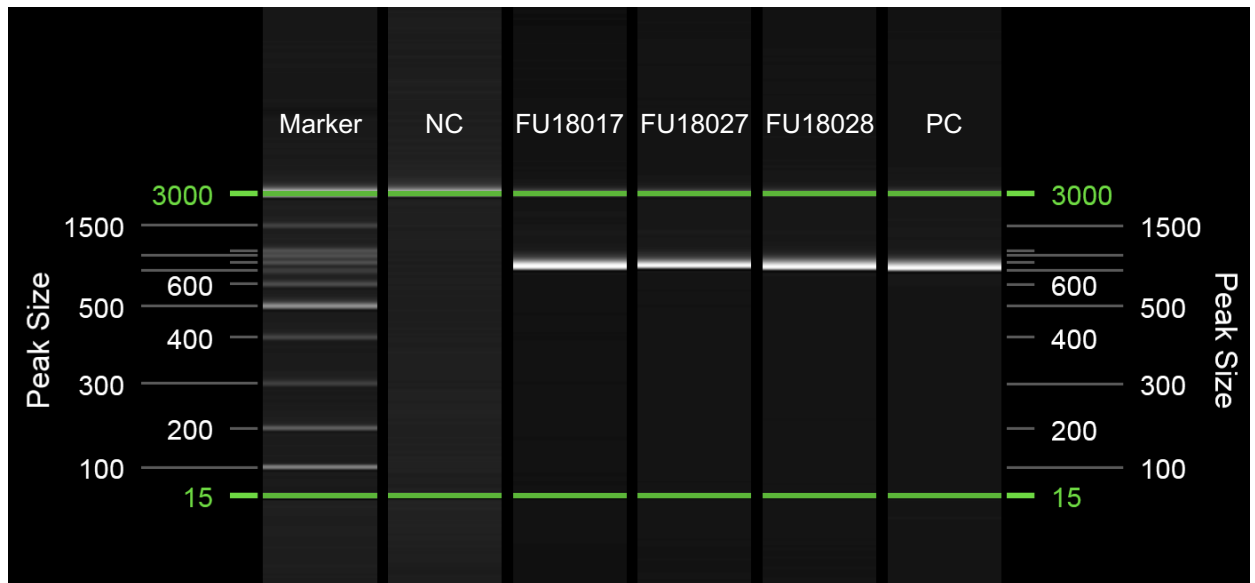

**Supplementary Figure S1.** Capillary electrophoresis of *flaB*-nested PCR amplicons.

NC; negative control (no template DNA), PC; positive control (*L. interrogans* serovar Hardjo strain Hardjoprajitno genomic DNA)
